# Supplementary material for: Population Pharmacokinetics of Revefenacin in Patients with Chronic Obstructive Pulmonary Disease
Source: Springer Nature journal article supplement (doi:10.1007/s40262-020-00938-3), 2020-10-29
Supplement: MOESM1 [file 18534794]

Electronic Supplementary Material

*Clinical Pharmacokinetics*

**Population Pharmacokinetics of Revefenacin in Patients With  
Chronic Obstructive Pulmonary Disease**

Arthur Lo, Marie T. Borin, and David L. Bourdet

**Corresponding author:**

Arthur Lo, PhD

Theravance Biopharma US, Inc., 901 Gateway Blvd, South San Francisco, CA 94080,  
USA. Email: [alo@theravance.com](mailto:alo@theravance.com)

## **Institutional Review Boards**

**Study 1:** Pharma-Ethics Independent Research Ethics Committee (Irene, South Africa) and Central Regional Ethics Committee, Ministry of Health, Wellington, New Zealand)

**Study 2:** NHS-Health Research Authority, National Research Ethics Service (Manchester, UK) and Health and Disability Ethics Committees, Ministry of Health, (Wellington, New Zealand)

**Study 3:** IntegReview (Austin, TX, USA)

**Studies 4 and 5:** Quorum Review IRB (Seattle, WA, USA)

## **Inclusion Criteria for the Phase 2 and 3 Studies**

Patients included in the Phase 2 studies were men or women of nonchildbearing potential, aged 40–75 years, with a current or former smoking history >10 pack-years and able to demonstrate the following respiratory criteria at screening: a ratio of forced expiratory volume in 1 second (FEV1)/forced vital capacity (FVC) of <0.7 and FEV1 of 35%–80% of the predicted normal value after withholding short-acting bronchodilators for  $\geq 6$  hours and long-acting bronchodilators for  $\geq 24$  hours.

Patients included in the Phase 3 studies were aged  $\geq 40$  years with a documented history of chronic obstructive pulmonary disease, a smoking history >10 pack-years, a post-ipratropium FEV1/forced vital capacity ratio of <0.7 and a post-ipratropium FEV1 of <80% of predicted normal value but at least 700 mL, constituting criteria for moderate to very severe chronic obstructive pulmonary disease.

**Table S1.** Pharmacokinetic data used from each study in the analysis

| Study number | Drug dose (µg nebulization) | Number of treated patients | Pharmacokinetic sampling time points                                                                    | Number of samples (Revefenacin, THRX-195518) | Study description                      |
|--------------|-----------------------------|----------------------------|---------------------------------------------------------------------------------------------------------|----------------------------------------------|----------------------------------------|
| 1            | 350, 700                    | 32                         | Predose, 0.25, 0.5, 0.75, 1, 2, 3, 4, 6, 8, 10, 12, 22, 24                                              | 896, 896                                     | Phase 2 single-dose cross over study   |
| 2            | 22, 44, 88, 175, 350, 700   | 62                         | Day 1: predose, 0.25, 0.5, 1, 2, 3, 4, 6<br>Day 7: predose, 0.25, 0.5, 1, 2, 3, 4, 6, 8, 12, 24         | 4287, 4287                                   | Phase 2 multiple-dose cross over study |
| 3            | 44, 88, 175, 350            | 355                        | Day 28: predose, 0.25, 0.5, 1, 2, 4, 6, 8, 12, 24, 48, 72, 96                                           | 429, 429                                     | Phase 2 multiple-dose study            |
| 4            | 88, 175                     | 410 <sup>a</sup>           | Day 1, 15, 29, 57: predose, 1–30 mins postdose<br>Day 84: predose, 1–30 mins postdose, 1–4 hrs postdose | 3902, 3903                                   | Phase 3 randomized control trial       |
| 5            | 88, 175                     | 402 <sup>a</sup>           | Day 1, 15, 29, 57: predose, 1–30 mins postdose<br>Day 84: predose, 1–30 mins postdose, 1–4 hrs postdose | 3866, 3895                                   | Phase 3 randomized control trial       |
| <b>Total</b> |                             | <b>1257</b>                |                                                                                                         | <b>13380, 13410</b>                          |                                        |

Some patients have contributed to multiple profiles in Phase 2 studies, and some patients did not have sufficient data to be included.

*hrs* hours, *mins* minutes.

<sup>a</sup>Number of patients in safety analysis set who received revefenacin.

### **Effect of age and weight on THRX-195518 PK**

For every 10% increase in age from 64 years, the  $CL_{met}/F$  decreases by approximately 8%. An 80-year-old subject will have about 16% lower  $CL_{met}/F$  as compared with a 64-year-old subject. For every 10% increase in weight from 81 kg, the  $F_{met}$  decreases by approximately 4%. A 64-year-old subject with an average weight of 120 kg will have about 15% lower  $F_{met}$  than a 64-year-old subject weighing 81 kg. To estimate the effect of age and weight on THRX-195518 PK, a simulation of 2000 patients with the study median age of 64 compared with 2000 simulated concentration profiles of identical patients at 40 and 85 years of age. To estimate the effect of weight on THRX-195518 PK, a simulation of 2000 patients with the study median weight of 81 kg was compared with 2000 simulated concentration profiles of identical patients with body weights of 50 and 150 kg. There is considerable overlap in the steady-state THRX-195518 PK profile and exposure over the entire age and weight range of patients in the study (**Figure S1a**).

The steady-state THRX-195518 exposure ( $AUC_{0-24}$ ) in the median (64-year-old) subject following a 175  $\mu\text{g}$  dose is predicted to be 0.797  $\text{ng}\cdot\text{hr}/\text{mL}$  (CV 50.7%). The corresponding predicted THRX-195518 exposures are 30% lower in a younger 40-year-old subject, and 24% higher in an older 85-year-old subject. The corresponding predicted THRX-195518 exposures are 21% higher in a 50 kg subject, and 24% lower in a 150 kg subject. A comparison of the individually predicted revfenacin exposures of all patients in the Phase 3 patients does not indicate any significant differences across different age groups and weights (**Figure S1b**). The effect of age and weight on THRX-195518 exposure is therefore considered minimal and does not warrant any dose adjustment of revfenacin.

**Fig S1** Effect of age and weight on (a) individually predicted steady-state THRX-195518 plasma PK profiles (95% PI) after 175  $\mu\text{g}$  dose and (b) exposures in patients from Phase 3 studies.

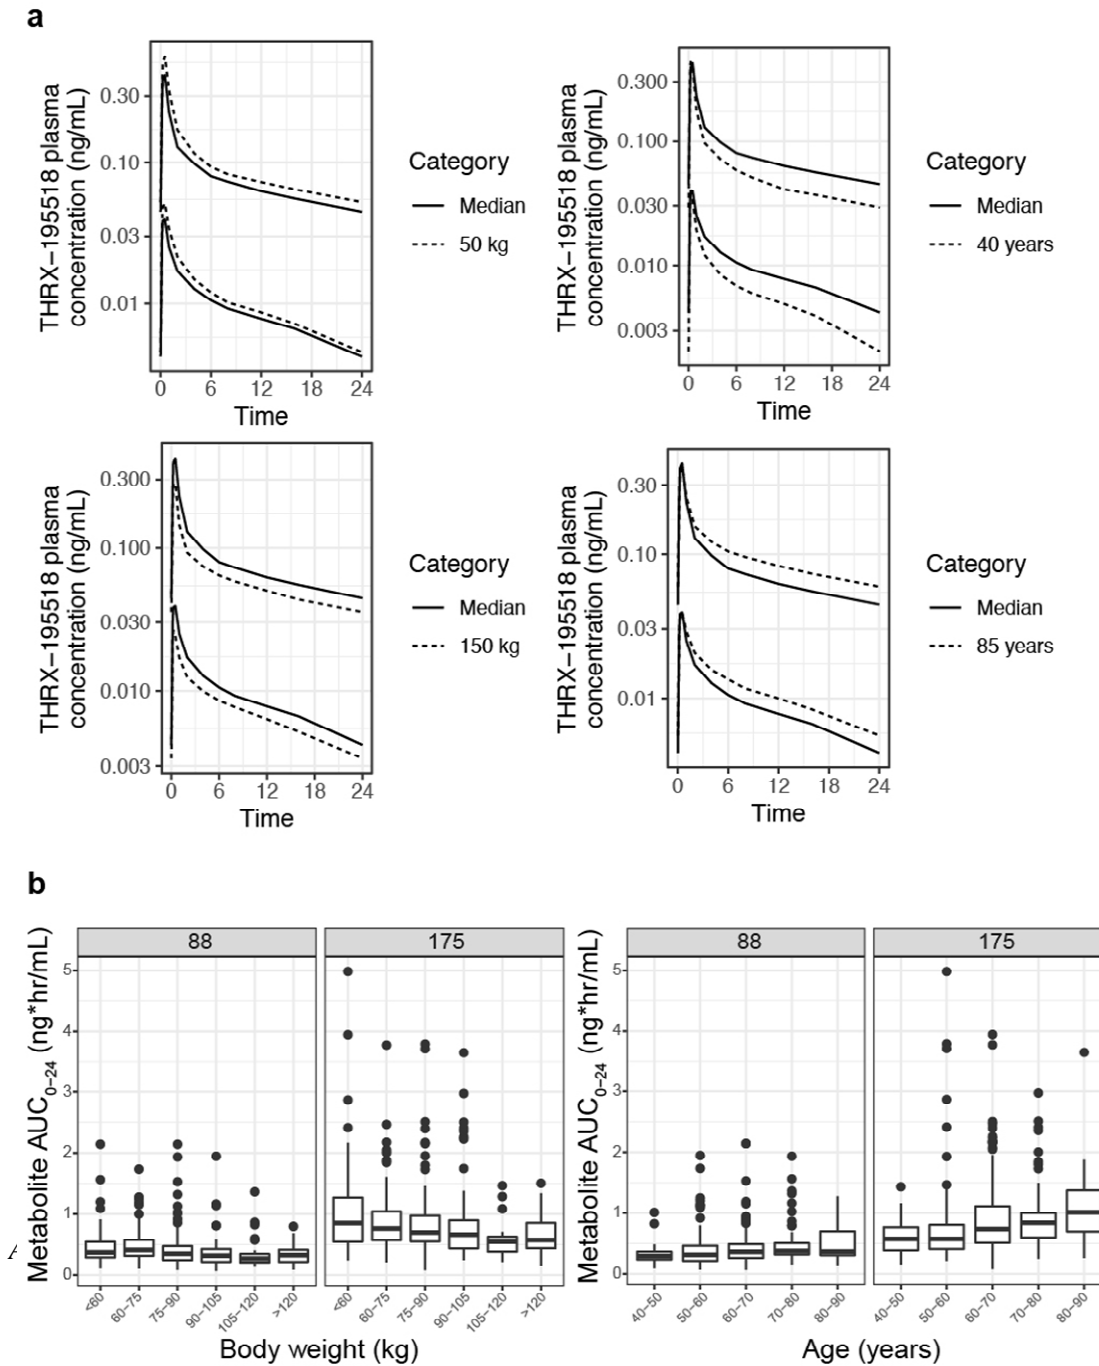

**Fig S2** Goodness of population fit for final revefenacin model. **(a)** Residuals; **(b)** weighted residuals.

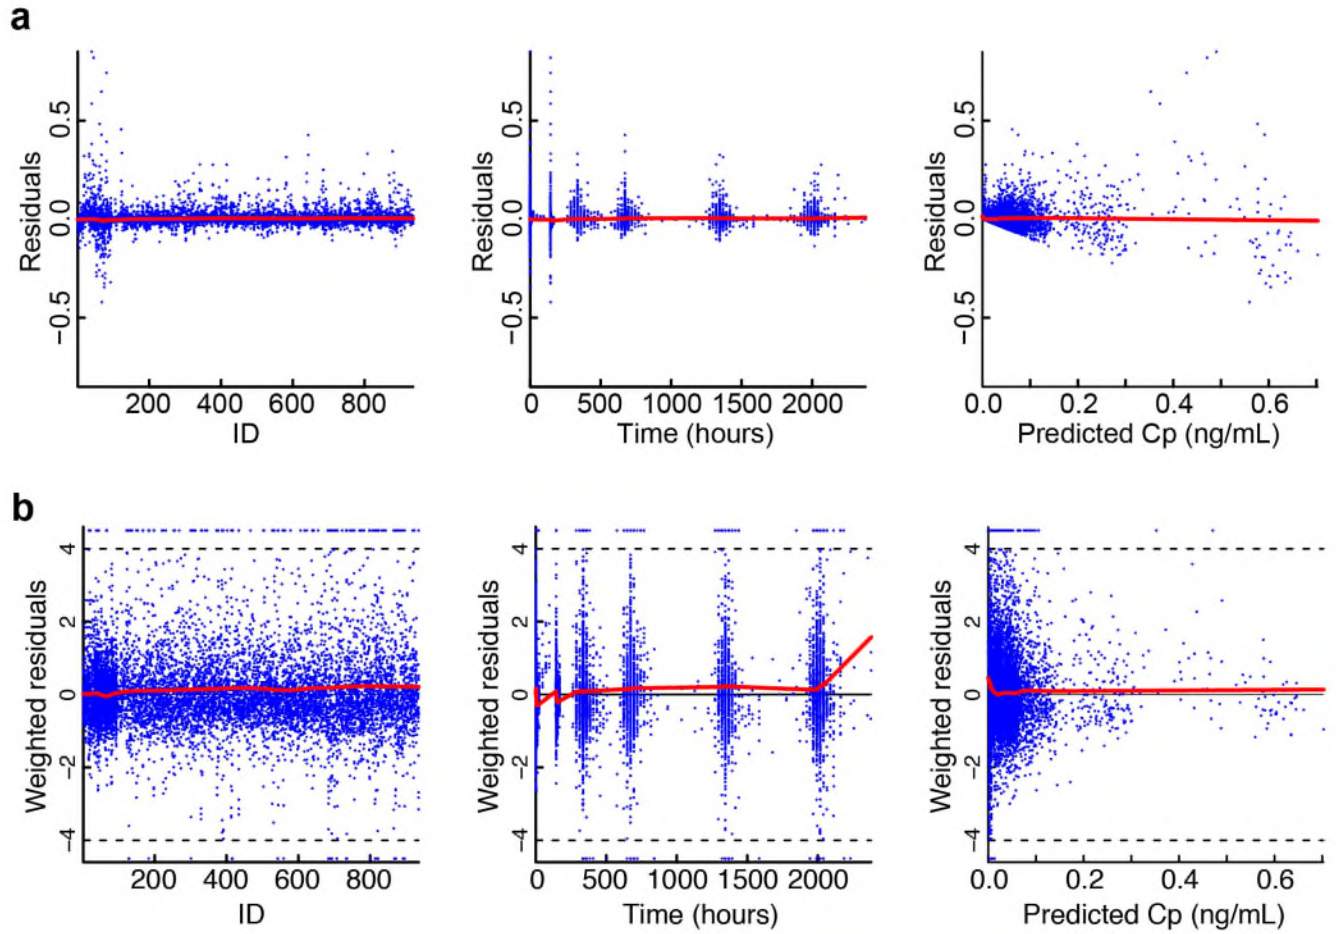

$C_p$  plasma concentration,  $ID$  individual subject identifier.

**Fig S3** Goodness of population fit for final THRX-195518 model. **(a)** Residuals; **(b)** weighted residuals.

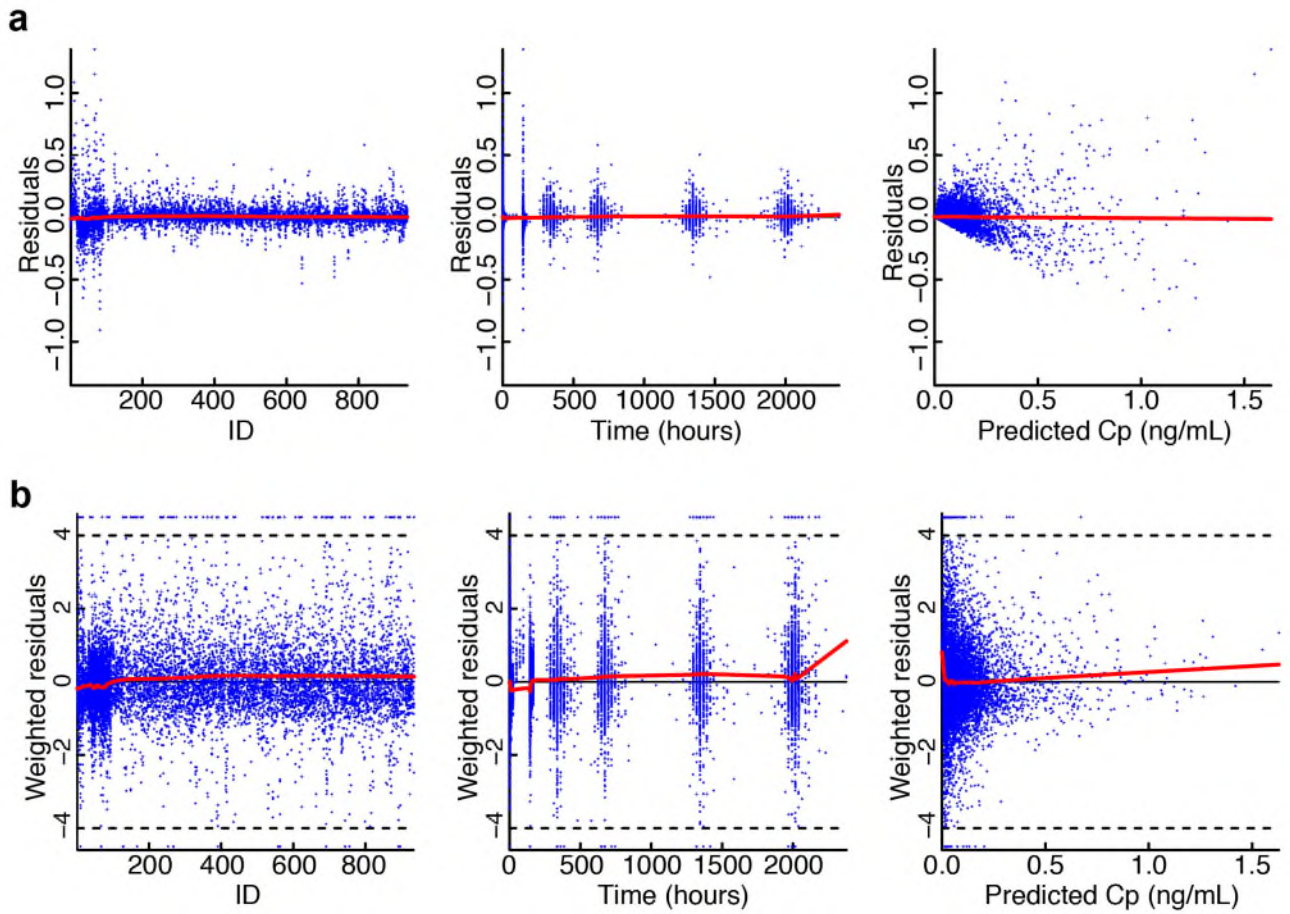

$C_p$  plasma concentration,  $ID$  individual subject identifier.
